# Supplementary material
Source: ML conference proceedings conference paper supplement (https://openreview.net/forum?id=87cCHIWcOU)
Supplement: supplementary_material [file attachment]

## A Task Settings

**Table 1.** Hyper-parameter configurations and evaluation metric in the experiments.

| Name of hyperparameter                     | Value | Evaluation metric                                                                                                                                                           |
|--------------------------------------------|-------|-----------------------------------------------------------------------------------------------------------------------------------------------------------------------------|
| Number of anatomy ( $\mathcal{N}$ )        | 10    | <b>Clinical Efficacy:</b> evaluate the F-1 scores of clinical findings                                                                                                      |
| Number of abnormalities ( $\mathcal{K}$ )  | 19    |                                                                                                                                                                             |
| Number of report formats ( $\mathcal{M}$ ) | 3     | <b>RadRQI:</b> evaluate the F-1 scores of Top-50 abnormalities and their associated attributes (TopK), and the number of abnormalities of which F-1 scores are not 0 (Hits) |
| Number of dimensions ( $\mathcal{D}$ )     | 1,024 |                                                                                                                                                                             |
| Number of memory slots ( $\mathcal{E}$ )   | 32    | <b>Uncertainty Accuracy:</b> evaluate the F-1 scores of abnormality with single uncertain diagnosis (Hard) and multiple nested uncertain diagnosis (Soft)                   |
| Number of patches ( $\mathcal{HW}$ )       | 16×16 |                                                                                                                                                                             |
| Number of degree ( $\mathcal{C}$ )         | 10    |                                                                                                                                                                             |

**Table 2.** 19 abnormalities with uncertain diagnosis, 10 anatomical parts identified by RadGraph and Chest ImaGemone, and three report formats considered.

|                         |                                                                                                                                                                                                                                                              |
|-------------------------|--------------------------------------------------------------------------------------------------------------------------------------------------------------------------------------------------------------------------------------------------------------|
| <b>Anatomical Parts</b> | Left lung, Right lung, Left hilar, Right hilar, Cardiac silhouette, Mediastinum, Upper mediastinum, Left apical zone, Right apical zone, Spine                                                                                                               |
| <b>Abnormalities</b>    | Atelectasis, Bone deformity, Calcification, Consolidation, Edema, Enlarged cardiac silhouette, Emphysema/COPD, Hernia, Granuloma, Lesion, Medical device, Fracture, Opacity, Other findings, Pleural effusion, Pneumothorax, Scarring, Thickening, Tube/line |
| <b>Report Format</b>    | Diagnostic order, Reporting length, Level of detail                                                                                                                                                                                                          |

## B Additional Results

**Table 3.** Evaluation on report generation quality on MIMIC CXR. DIAGDE shows comparable performances in NLG quality when high clinical accuracy is achieved.

| Model                       | Natural Language Generation (NLG) |              |              |
|-----------------------------|-----------------------------------|--------------|--------------|
|                             | BLEU                              | ROUGE        | CIDEr        |
| TRANSFORMER                 | 0.120                             | 0.160        | <u>0.135</u> |
| $\mathcal{M}^2$ TRANSFORMER | <b>0.159</b>                      | <b>0.250</b> | 0.100        |
| R2GEN                       | 0.120                             | 0.161        | <b>0.170</b> |
| R2GEN-CMN                   | <u>0.143</u>                      | <u>0.203</u> | 0.132        |
| WCL                         | 0.122                             | 0.152        | 0.031        |
| XProNET                     | 0.111                             | 0.153        | 0.030        |
| GIT                         | 0.081                             | 0.161        | 0.056        |
| DIAGUE (proposed)           | 0.140                             | 0.169        | 0.109        |

**Table 4.** Performance on report generation on an additional IU Xray dataset (2,848).

| Model             | CE           |              | RadRQI-F1    |             | Uncertainty Acc. |              |
|-------------------|--------------|--------------|--------------|-------------|------------------|--------------|
|                   | (14)         | (19)         | TopK         | Hits        | Hard             | Soft         |
| R2GEN             | 0.289        | 0.310        | <u>0.071</u> | 10.0        | <u>0.423</u>     | <u>0.432</u> |
| R2GEN-CMN         | 0.290        | 0.323        | 0.056        | 10.0        | 0.368            | 0.375        |
| WCL               | <u>0.595</u> | <u>0.630</u> | 0.065        | <u>16.0</u> | 0.349            | 0.362        |
| XProNET           | 0.584        | 0.599        | 0.038        | <b>17.0</b> | 0.321            | 0.339        |
| GIT               | 0.522        | 0.569        | 0.058        | 9.0         | 0.267            | 0.276        |
| DIAGUE (proposed) | <b>0.626</b> | <b>0.700</b> | <b>0.076</b> | 13.0        | <b>0.446</b>     | <b>0.458</b> |

**Fig. 1.** Uncertain ratio of 19 radiology abnormalities (# of uncertainty / # of presence diagnosis) from MIMIC CXR, which underscore the necessity of uncertainty estimation.

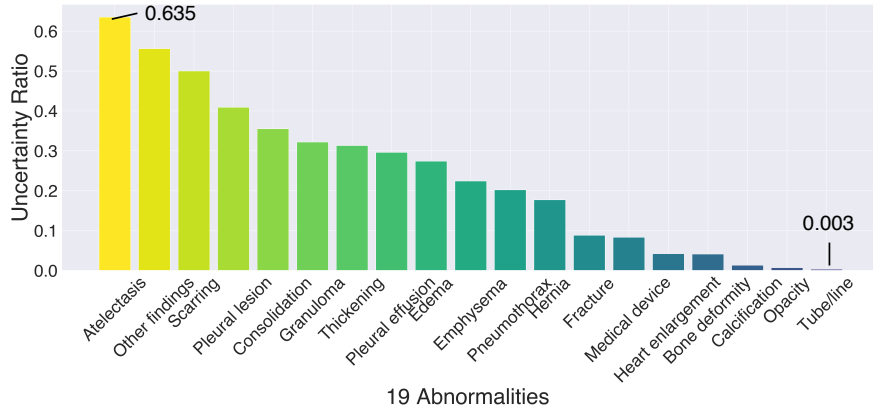

## C Ablation Study

**Table 5.** Performance on multi-label classification (AUC) of *abnormality* and *uncertainty* prediction. (VARIABILITY) corresponds to three diagnostic variations proposed.

| Model (setting)      | Abnormality Prediction | Uncertainty Prediction |
|----------------------|------------------------|------------------------|
| FFN (MULTI-CLASS)    | 0.591                  | 0.573                  |
| FFN (MULTI-LABEL)    | 0.681                  | 0.690                  |
| FFN (ENTROPY)        | 0.779                  | 0.561                  |
| FFN (VARIABILITY)    | 0.770                  | <b>0.724</b>           |
| DIAGUE (MULTI-CLASS) | 0.771                  | 0.700                  |
| DIAGUE (MULTI-LABEL) | 0.763                  | 0.744                  |
| DIAGUE (VARIABILITY) | <b>0.804</b>           | <b>0.782</b>           |

**Table 6.** Ablation study on report generation by MIMIC CXR data. DIAGUE<sup>‡</sup> corresponding to DIAGUE w/  $(b, u, \mathcal{X})$  is the proposed approach.

| Model                     | CE           |              | RadRQI-F1    |             | Uncertainty  |              | NLG          |              |              |
|---------------------------|--------------|--------------|--------------|-------------|--------------|--------------|--------------|--------------|--------------|
|                           | (14)         | (19)         | TopK         | Hits        | Hard         | Soft         | BLEU         | ROUGE        | CIDEr        |
| DIAGUE w/ $(\emptyset)$   | 0.663        | 0.669        | 0.310        | 25.5        | 0.370        | 0.430        | 0.088        | 0.159        | 0.050        |
| DIAGUE w/ $(b)$           | 0.659        | <b>0.697</b> | <b>0.322</b> | 27.0        | 0.370        | 0.412        | 0.088        | 0.161        | 0.066        |
| DIAGUE w/ $(b, u)$        | 0.654        | 0.693        | 0.320        | 30.0        | 0.438        | 0.467        | 0.120        | 0.153        | 0.059        |
| DIAGUE w/ $(\mathcal{X})$ | <b>0.666</b> | 0.590        | 0.300        | 26.0        | 0.360        | 0.429        | <b>0.145</b> | <b>0.199</b> | <b>0.109</b> |
| DIAGUE <sup>‡</sup>       | 0.664        | 0.688        | 0.319        | <b>31.5</b> | <b>0.441</b> | <b>0.473</b> | 0.140        | 0.169        | <b>0.109</b> |
